# Supplementary material for: Functional modification of adipocytes by grape seed extract impairs their pro-tumorigenic signaling on colon cancer stem cells and the daughter cancer cells
Source: Oncotarget. 2014 Oct 10;5(20):10151–69. doi: 10.18632/oncotarget.2467 (PMC4259412; doi:10.18632/oncotarget.2467)
Supplement: Supplementary file 1 [file oncotarget-05-10151-s001.pdf]

## SUPPLEMENTARY FIGURE AND TABLE

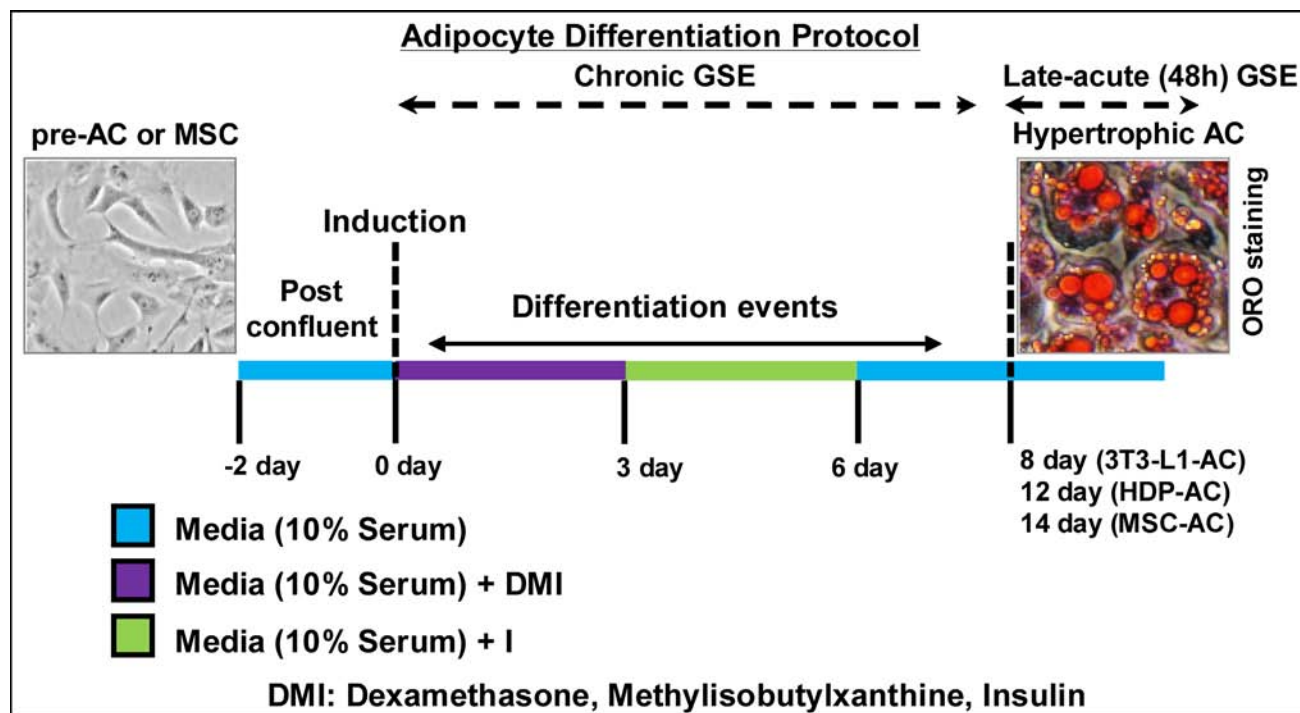

**Supplementary Figure S1: Depiction of GSE treatment during different stages of adipocyte (AC) differentiation.** Representative scheme for addition of additives during different stages of 3T3-L1-AC adipogenesis are shown. Phase contrast image on the left side of scheme represents the initial fibroblast/ pre-adipocyte or the mesenchymal stem cells before adipogenesis, while the ORO stained adipocytes on right side of scheme is a representative image of matured adipocytes. ORO stained red oil droplets help identify maturation of adipocytes; 3T3-L1-AC are matured by day 8 after induction of adipogenesis, while HDP-AC and MSC-AC are matured by day 12 and day 14, respectively. ORO: Oil Red-O stained lipids. Mouse 3T3-L1 differentiated adipocytes (3T3 L1-AC); human type II diabetic visceral adipocytes (HDP-AC); human adipocytes from adipose tissue derived mesenchymal stem cells (MSC-AC).

**Supplementary Table S1. Primer sequence of genes used for semi-quantitative analysis by RT-PCR.**

| Gene             | Primer (5'–3')            |
|------------------|---------------------------|
| <i>LGR5</i> (F)  | GGTGACAACAGCAGTATGGACGA   |
| <i>LGR5</i> (R)  | GAAGGTGAACACTGCACTGAATGAA |
| <i>EpCAM</i> (F) | AATGTGTGTGCGTGGA          |
| <i>EpCAM</i> (R) | TTCAAGATTGGTAAAGCCAGT     |
| <i>CD44</i> (F)  | AGATCAGTCACAGACCTGCC      |
| <i>CD44</i> (R)  | GCAAACTGCAAGAATCAAAGCC    |
| <i>CD133</i> (F) | CAGAGTACAACGCCAAACCA      |
| <i>CD133</i> (R) | AAATCACGATGAGGGTCAGC      |
| <i>OCT-4</i> (F) | TCCCATGCATTCAAAGTGG       |
| <i>OCT-4</i> (R) | CCAAAAACCCTGGCACAAACT     |
| <i>NANOG</i> (F) | TGGACACTGGCTGAATCCTTC     |
| <i>NANOG</i> (R) | CGTTGATTAGGCTCCAACCAT     |
| <i>HES-1</i> (F) | TCAACACGACACCGGATAAA      |
| <i>HES-1</i> (R) | CCGCGAGCTATCTTTCTTCA      |
| <i>BMI-1</i> (F) | AATGTCTTTTCCGCCCGCT       |
| <i>BMI-1</i> (R) | ACCCTCCACAAAGCACACACAT    |
| <i>MSI-1</i> (F) | GAGGGTTCGGGTTTGTACG       |
| <i>MSI-1</i> (R) | GGCGACATCACCTCCTTTGG      |
| <i>GAPDH</i> (F) | CCCCTGGCCAAGGTCATCCA      |
| <i>GAPDH</i> (R) | ACAGCCTTGGCAGCGCCAGT      |
